# Supplementary material for: Hepatocyte-specific knockout of HIF-2α cannot alleviate carbon tetrachloride-induced liver fibrosis in mice
Source: PeerJ. 2023 Apr 3;11:e15191. doi: 10.7717/peerj.15191 (PMC10078453; doi:10.7717/peerj.15191)
Supplement: Supplemental Information 2 [file peerj-11-15191-s002.xlsx]

## Sheet: Sheet1
Group	MouseID	IPGTT(0 min)	IPGTT(30 min)	IPGTT(60 min)	IPGTT(90 min)	IPGTT(120 min)	AUC of GTT	IPITT(0 min)	IPITT(30 min)	IPITT(60 min)	IPITT(90 min)	IPITT(120 min)	AUC of ITT	HOMA-IR	ALT	AST	TC	TG	LDL	HDL	Positive fibrostic area	ISHAK scores	Positive area of α-SMA	HYP in liver tissues	Positive area of α-HIF-2α
wt	1	6	22.7	15.6	11	9.3	1709	11.1	8.2	5.9	6.3	8.4	904.5		8.69296	14.1543	2.40253	0.0310577	0.551872	0.0310577
wt	2	5.7	20.5	15.7	11.7	9.1	1659	9	6.2	5	5.4	5.5	715.5		7.10132	18.4676	3.04118	0.034108	0.68984	0.034108
wt	3	6.1	23	15	11.5	10.8	1739	11.2	6.8	5.4	6	7.2	822		7.31949	18.7696	2.79788	0.0363264	0.551872	0.0363264
wt	4	5.6	22.6	13.3	9.4	8.1	1565	8	5.1	3.7	4.1	4.2	570		7.99245	13.4484	2.76747	0.0379902	0.804813	0.0379902
wt	5	5.9	22.1	14.9	10.6	7.7	1632	9.4	6.9	5.2	5.9	6	771		6.25943	15.6608	2.73706	0.0357718	0.666845	0.0357718
ko	6	6.6	21.7	15.4	9.9	7.7	1625	10.3	6.4	5.6	5.8	5.9	729		8.93257	14.8915	3.13241	0.0418724	0.781818	0.0418724
ko	7	5	20.1	15.1	12.8	10.9	1679	10.6	6.1	3.9	4.9	6.4	777		6.46527	13.6803	2.49376	0.0399313	0.436898	0.0399313
ko	8	6.9	23	14.1	9.2	7.4	1604	9.6	5.9	3.3	3.6	4.6	702		7.10132	17.0165	2.37212	0.0346626	0.712834	0.0346626
ko	9	6	20.4	12.8	11.1	8.9	1553	10.1	6.2	5	5.3	6.2	597		6.88622	16.7379	3.07159	0.0349399	0.505882	0.0349399
ko	10	6.8	20.3	16	8.7	6.8	1554	10.8	6.9	6.8	7.7	8.1	739.5		7.54074	15.6608	3.19324	0.0346626	0.64385	0.0346626
ko	11	6.5	24.6	15.1	10.8	8.3	1737	10	6.3	5.3	5	5.4	925.5		7.99245	15.1443	3.07159	0.0382675	0.620856	0.0382675
wt	12	6	23	13.86	9.94	6.7	1595	6	23	13.86	9.94	6.7	1595	1.67613	16.9155	30.765	2.67414	0.790443	0.501345	6.09677	0.348268	0	28.847	0.0407609	6.68
wt	13	6.3	21	13.14	10.08	6.5	1519	6.3	21	13.14	10.08	6.5	1519	1.4344	16.9155	26.4479	2.75054	0.901773	0.69417	4.76129	0.234737	0	21.2091	0.0883152	7.71
wt	14	6.4	20.75	13.86	9.52	5.4	1501	6.4	20.75	13.86	9.52	5.4	1501	1.45717	22.1601	50.4876	2.92882	0.656847	0.327803	4.99355	0.384519	0	27.6286	0.0543478	8.33
wt	15	5.1	22	14.22	9.24	5.9	1529	5.1	22	14.22	9.24	5.9	1529	1.79267	14.7568	26.137	2.52133	0.935172	0.269955	4.76129	0.311824	0	28.5616	0.0815217	7.78
wt	16	6.2	22.5	14.22	9.52	6.5	1578	6.2	22.5	14.22	9.52	6.5	1578	2.87428	13.3826	35.2465	2.47039	0.901773	0.269955	5.34194	1.15404	0	29.9864	0.0611413	7.43
wt	17	5.7	21	14.22	9.66	6.9	1535	5.7	21	14.22	9.66	6.9	1535		14.5242	31.8383	2.26665	0.89064	0.404933	5.34194	0.260079	0	31.9864	0.0373641	7.30009
wt	18	6.3	18.5	12.6	10.36	7	1473	6.3	18.5	12.6	10.36	7	1473		14.5242	34.464	2.77601	0.912906	0.269955	4.81935	0.958546	0	25.8505		7.45818
wt	19	6.4	18.25	12.06	10.92	8.4	1519	6.4	18.25	12.06	10.92	8.4	1519		16.1826	39.3863	2.87788	0.723645	0.250673	5.05161	0.886865	0	26.1787		7.01678
ko	20	5.5	21.5	13.5	10.08	6.9	1538	5.5	21.5	13.5	10.08	6.9	1538	1.40662	12.2757	20.2237	2.49586	0.656847	0.347085	5.86452	0.717775	0	27.1469	0.0611413	7.54522
ko	21	5.7	23	14.76	10.5	7.2	1641	5.7	23	14.76	10.5	7.2	1641	1.6238	12.4943	27.398	2.5468	0.712512	0.30852	5.92258	0.205148	0	19.355	0.0441576	6.60389
ko	22	5.4	22.25	14.94	10.64	6.5	1613	5.4	22.25	14.94	10.64	6.5	1613	2.89951	13.1585	26.137	2.26665	0.66798	0.192825	5.86452	0.591404	0	27.5892	0.0679348	6.88526
ko	23	6.7	21.75	14.4	10.5	6.8	1602	6.7	21.75	14.4	10.5	6.8	1602	1.61185	13.6081	20.7404	2.03744	0.590049	0.347085	7.2	0.489989	0	22.5074	0.091712	7.11919
ko	24	6.2	21	13.86	10.08	6.1	1533	6.2	21	13.86	10.08	6.1	1533	2.32505	15.4631	32.2029	2.41946	0.868374	0.404933	5.74839	0.463633	0	19.9159	0.0509511	7.12652
ko	25	6	23	13.5	9.94	6.3	1578	6	23	13.5	9.94	6.3	1578		13.1585	29.042	2.41946	0.723645	0.404933	4.52903	0.143796	0	34.2547	0.0577446	7.17151
ko	26	5.2	21.5	13.68	8.82	6.6	1497	5.2	21.5	13.68	8.82	6.6	1497		14.5242	27.0783	2.5468	0.77931	0.46278	5.4	0.336297	0	21.3342		7.54522
ko	27	7.9	23.25	14.04	10.08	7	1645	7.9	23.25	14.04	10.08	7	1645		14.5242	32.9425	2.03744	0.690246	0.327803	4.64516	0.371631	0	23.274		7.05396
wt ccl4	28	4.8	25	14.76	10.64	6.5	1682	4.8	25	14.76	10.64	6.5	1682	4.7731	213.194	76.02	2.39399	0.656847	0.790583	1.97419	7.55836	6	50.7395	0.13587	14.5986
wt ccl4	29	4.3	23.25	14.94	10.78	6.8	1636	4.3	23.25	14.94	10.78	6.8	1636	2.78612	214.334	94.0504	1.9865	0.701379	0.713453	2.49677	11.5427	6	49.88	0.132473	11.5396
wt ccl4	30	6.5	25.75	15.12	10.64	7.2	1751	6.5	25.75	15.12	10.64	7.2	1751	2.49431	212.058	90.5394	1.88463	0.478719	0.559193	1.21935	5.30198	5	62.4817	0.163043	11.6974
wt ccl4	31	4.9	23.5	15.84	9.66	5.7	1629	4.9	23.5	15.84	9.66	5.7	1629	3.83311	204.222	97.6693	1.68089	0.690246	0.655605	0.929032	9.38128	6	46.4121	0.173234	11.5994
wt ccl4	32	6.2	32	15.66	10.78	6.2	1939	6.2	32	15.66	10.78	6.2	1939	2.54424	196.585	94.945	1.65542	0.745714	0.732735	1.50968	11.7675	6	50.4119	0.16644	9.12027
wt ccl4	33	6.4	22.25	14.22	9.8	6.5	1582	6.4	22.25	14.22	9.8	6.5	1582		196.585	87.1343	2.24118	0.423054	1.17623	1.8	14.2006	6	52.1221	0.15625	10.0044
wt ccl4	34	5.7	21	18.54	14.42	10.8	1866	5.7	21	18.54	14.42	10.8	1866		207.555	93.1626	2.13931	0.44532	0.636323	1.56774	9.60168	6	35.7846		11.7075
ko ccl4	35	7	22.5	15.3	11.06	7.7	1686	7	22.5	15.3	11.06	7.7	1686	2.88345	216.627	103.304	2.21571	0.823842	0.424215	1.97419	8.45758	6	43.666	0.152853	13.6372
ko ccl4	36	6.6	23.75	16.92	10.92	6.3	1741	6.6	23.75	16.92	10.92	6.3	1741	3.47542	203.119	107.202	2.57227	0.77931	0.944843	1.91613	5.9641	5	47.6174	0.132473	10.534
ko ccl4	37	8	23.25	15.48	10.92	7.3	1719	8	23.25	15.48	10.92	7.3	1719	2.46386	204.222	108.194	2.85241	0.723645	0.886996	2.72903	6.03974	5	62.4804	0.163043	9.23501
ko ccl4	38	5.2	24.5	15.12	10.78	7.3	1700	5.2	24.5	15.12	10.78	7.3	1700	2.32329	209.799	107.202	2.36852	0.723645	0.53991	2.49677	13.144	6	39.8389	0.125679	9.28033
ko ccl4	39	4.8	22.75	14.58	10.22	6.4	1595	4.8	22.75	14.58	10.22	6.4	1595	4.44398	207.555	76.02	2.49586	0.690246	0.482063	2.49677	13.4873	6	41.5066	0.149457	11.4677
ko ccl4	40	6.7	23.25	15.3	10.5	6.9	1676	6.7	23.25	15.3	10.5	6.9	1676		210.926	104.268	1.9865	0.656847	0.61704	2.7871	5.65295	5	48.4351	0.16644	12.7397
