# Supplementary material for: Hepatocyte-specific knockout of HIF-2α cannot alleviate carbon tetrachloride-induced liver fibrosis in mice
Source: PeerJ. 2023 Apr 3;11:e15191. doi: 10.7717/peerj.15191 (PMC10078453; doi:10.7717/peerj.15191)
Supplement: Supplemental Information 3 [file peerj-11-15191-s003.xlsx]

## Sheet: sheet
Group	MouseID	1st measurement		2nd measurement		3rd measurement		4th measurement		5th measurement		6th measurement		7th measurement		8th measurement		Liver/body weight (g/g)	Fat/body weight (g/g)	Lean/body weight (g/g)
		Food intake (g/d/mouse)	Weight (g) or weight (%)	Food intake (g/d/mouse)	Weight (g)	Food intake (g/d/mouse)	Weight (g)	Food intake (g/d/mouse)	Weight (g)	Food intake (g/d/mouse)	Weight (g)	Food intake (g/d/mouse)	Weight (g)	Food intake (g/d/mouse)	Weight (g)	Food intake (g/d/mouse)	Weight (g)
wt	1	3.61667	25.1	3.7125	25.3	3.61333	25	4.11333	25.2	3.77333	25.4	4.175	26.8	4	26.6	3.58	27.5	0.0473333	0.119504	0.819149
wt	2		29.6		29.9		30		30.4		29.8		30.7		31.2		32.2	0.0380711	0.108434	0.816566
wt	3		27.4		28.1		28.3		28.7		28.6		28.9		29.1		30.9	0.0358038	0.102589	0.813269
wt	4		27		28		27.4		28.4		28.6		30.5		30.7		31.8	0.0451957	0.0660436	0.830841
wt	5		25.6		24.8		25.4		26.9		26.6		28.5		30.2		31.7	0.0446909	0.0855799	0.831661
ko	6	3.7444	26.9	3.65833	27.4	4.05556	27.3	4.18889	27.9	4.07778	27.8	3.725	28.8	3.9	28.5	3.6	29.9	0.0482619	0.104392	0.810811
ko	7		27.2		28		27.5		28.3		28.6		29.4		31.2		32.6	0.0337197	0.0955128	0.838782
ko	8		26.8		27.2		26.9		27.5		26.7		27		27.7		30.3	0.0455415	0.0706897	0.838966
ko	9		26.9		27.2		26.6		27.1		26.7		28.2		28.6		29.9	0.041159	0.0813149	0.828028
ko	10		27.7		27.5		28		28.7		28.5		30.3		30.9		32.3	0.0397594	0.0650327	0.847386
ko	11		26.6		26.9		26.6		27		26.8		28.5		29.1		30.6	0.0404662	0.0919192	0.831313
wt	12	2.95792	100.662	3.02167	100.662	3.095	102.649	2.8825	102.318	2.995	103.974	2.99444	105.629	3.05417	105.96	3.10833	107.285	0.056729
wt	13		97.2308		99.3846		99.6923		101.231		101.846		102.462		105.231		102.154	0.057701
wt	14		101.908		102.672		103.817		106.489		109.924		108.779		111.45		108.015	0.054348
wt	15		104.184		107.95		113.808		111.297		115.9		115.9		119.665		118.41
wt	16		102.509		103.226		103.943		103.584		105.735		108.244		110.036		111.828
wt	17		99.2674		102.198		105.128		102.93		104.762		105.861		105.128		105.861
wt	18		98.4906		97.3585		101.132		101.887		104.151		105.66		104.906		108.679
wt	19		96.875		95.4861		100		101.736		105.556		105.556		104.514		104.167
ko	20	2.96292	97.5524	2.93167	97.2028	3.0025	104.895	3.0975	100	3.11375	101.748	2.88889	100.699	2.89167	106.643	2.90139	106.643	0.056291
ko	21		97.2028		98.2517		102.098		103.846		107.343		106.294		108.042		106.993	0.055016
ko	22		98.5455		100		103.636		104.727		110.909		110.182		112.364		112.727	0.057325
ko	23		100		98.9286		107.143		107.143		107.857		107.857		109.643		107.143
ko	24		98.6254		98.2818		100		100.687		101.375		103.093		101.718		101.375
ko	25		99.1837		101.224		100.408		103.265		108.163		107.347		107.347		110.204
ko	26		100		100		101.916		102.682		101.916		104.598		103.448		106.13
ko	27		98.1818		100.727		101.091		101.455		104		104		105.091		107.636
wt ccl4	28	3.11417	101.633	3.55833	103.673	3.37	102.041	3.2675	108.98	3.34542	111.429	3.425	108.163	3.49062	111.02	3.35	111.429	0.061258
wt ccl4	29		98.5965		99.2982		101.404		99.6491		103.509		102.456		104.211		103.509	0.064516
wt ccl4	30		98.3221		100.671		105.034		100.671		104.027		106.711		105.705		105.705	0.059233
wt ccl4	31		98.0545		100.778		102.724		104.28		104.28		104.28		104.28		105.058
wt ccl4	32		96.1039		95.7792		87.013		95.1299		95.7792		96.1039		97.4026		97.4026
wt ccl4	33		94.3396		95.0943		96.9811		96.2264		96.2264		96.9811		98.4906		99.2453
wt ccl4	34		98.5185		97.4074		101.111		102.963		102.222		102.963		104.444		106.667
ko ccl4	35	3.19375	100.717	3.12083	101.792	3.12917	102.509	3.23333	101.792	3.10208	102.509	3.01528	106.452	3.10694	105.018	3.30417	106.093	0.051546
ko ccl4	36		101.681		99.5798		104.622		105.042		107.563		107.143		105.462		108.823	0.055016
ko ccl4	37		100.83		100.415		101.245		104.564		106.639		107.054		106.224		106.224	0.055762
ko ccl4	38		99.2308		98.8461		101.538		100.769		101.923		105.385		103.846		106.538
ko ccl4	39		97.1014		100.725		101.812		104.71		108.696		108.696		109.42		106.522
ko ccl4	40		100.746		102.985		102.612		104.105		106.716		107.836		108.209		108.209
